# Supplementary material for: Direct Aspiration vs. Partial and Complete Stent Retriever Retraction in Stroke: Influence of Collateral Flow on Recanalization and Embolic Risk
Source: Research Square preprint supplement (doi:10.21203/rs.3.rs-7130437/v1), 2025-08-07
Supplement: Supplementary file 1 [file b8e8527fc20b050614d3976e.docx]

**Direct Aspiration vs. Partial and Complete Stent Retriever Retraction in Stroke: Influence of Collateral Flow on Recanalization and Embolic Risk**

Magda Jablonska1,3, Jiahui Li2,3, Riccardo Tiberi2,3, Eder Ariel Paredes Cruz3,4, Marc Ribo2,3

1 2-nd Department of Radiology, Medical University of Gdansk, Gdansk, Poland

2 Stroke Unit, Vall d’Hebron University Hospital, Barcelona, Spain

3 Stroke Research, Vall d’Hebron Research Institute, Barcelona, Spain

4 Autonomous University of Barcelona, Barcelona, Spain

**Corresponding author:**

Marc Ribo

Stroke Unit, Neurology, Vall d’Hebron University Hospital, Barcelona, Spain

Hospital Vall d’Hebron, Passeig de la Vall d’Hebron Barcelona 119-129, Spain

E-mail: marcriboj@hotmail.com

|  | **OVERALL %** | **PCM %** | **GCM %** | **P VALUE** |
| --- | --- | --- | --- | --- |
| **TICI 2b-3** | | | | |
| SOFT CLOT | 71,7 | 63,3 | 80 | 0.043* |
| STIFF CLOT | 65,8 | 63,3 | 68,3 | 0.564 |
| **TICI 2c-3** | | | | |
| SOFT CLOT | 71,7 | 63,3 | 80 | 0.10* |
| STIFF CLOT | 24,2 | 15 | 33,3 | 0.019* |

**Supplemental material 1.** Recanalization rates (TICI 2b-3 and TICI 2c-3) for PCM and GCM based on clot type.

|  | **OVERALL %** | **Complete SR retraction technique %** | **Partial SR retraction technique %** | **Direct aspiration %** |
| --- | --- | --- | --- | --- |
| **TICI 2b-3** | | | | |
| OVERALL | 68,8 | 90 | 52,5 | 63,7 |
| **PCM** | | | | |
| TOTAL | 63,3 | 82,5 | 50 | 57,5 |
| SOFT CLOT | 63,3 | 90 | 45 | 55 |
| STIFF CLOT | 63,3 | 75 | 55 | 60 |
| **GCM** | | | | |
| TOTAL | 74,2 | 97,5 | 55 | 70 |
| SOFT CLOT | 80 | 100 | 60 | 80 |
| STIFF CLOT | 68,3 | 95 | 50 | 60 |
| **TICI 2c-3** | | | | |
| OVERALL | 23,8 | 25 | 15 | 31,3 |
| **PCM** | | | | |
| TOTAL | 14,2 | 12,5 | 5 | 25 |
| SOFT CLOT | 13,3 | 10 | 5 | 25 |
| STIFF CLOT | 15 | 15 | 5 | 25 |
| **GCM** | | | | |
| TOTAL | 33,3 | 37,5 | 25 | 37,5 |
| SOFT CLOT | 33,3 | 35 | 30 | 35 |
| STIFF CLOT | 33,3 | 40 | 20 | 40 |

**Supplemental material 2.** Revascularization outcomes based on thrombectomy techniques and clot characteristics.

**
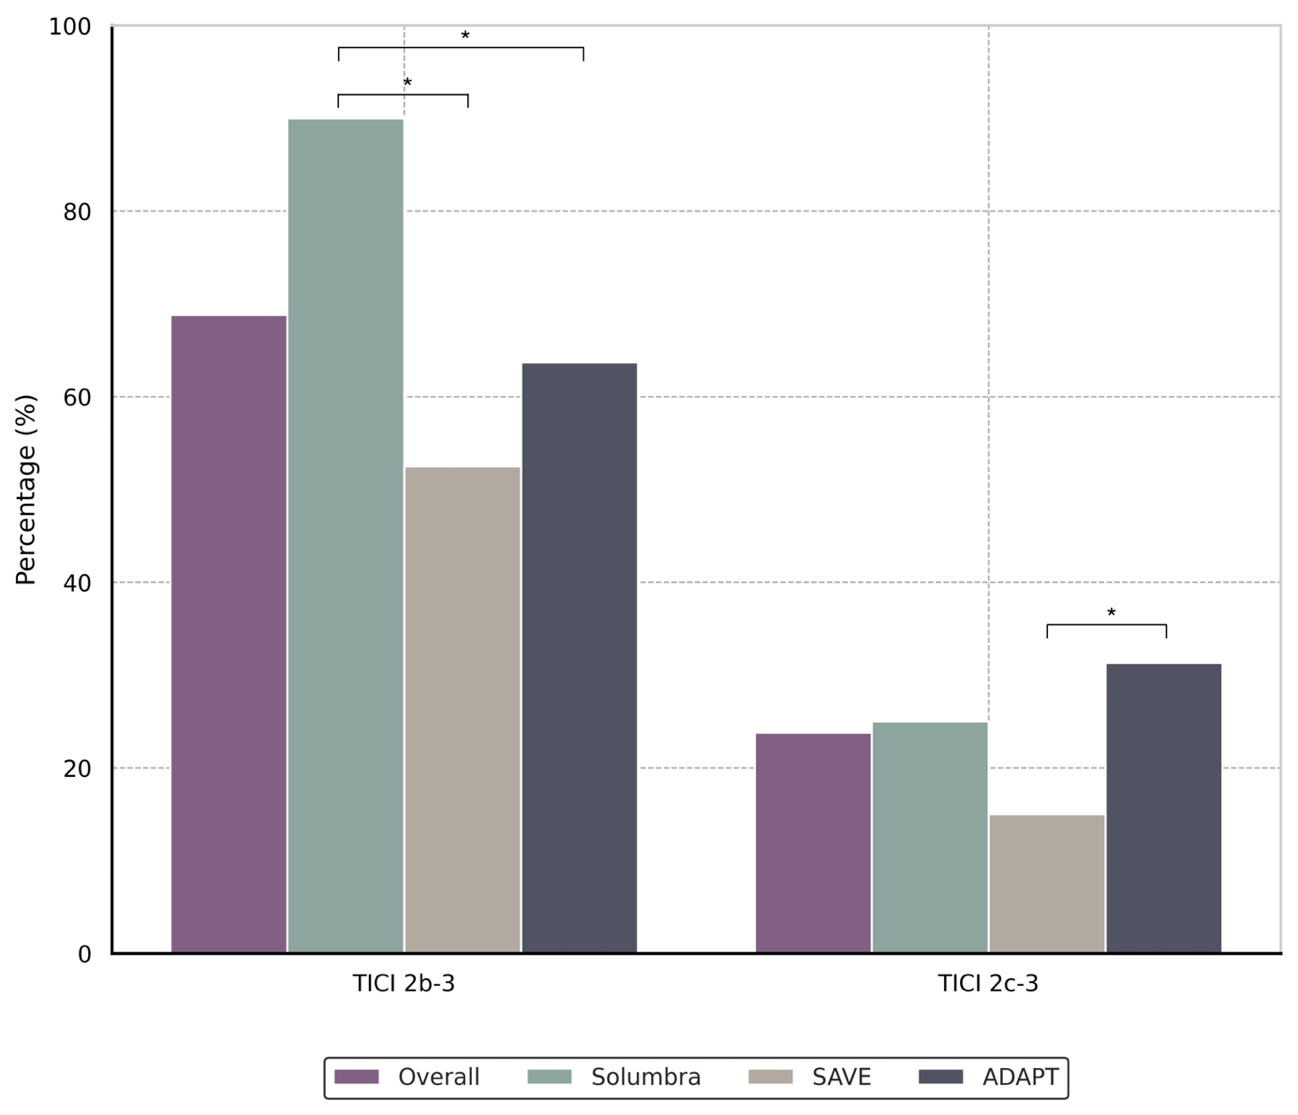
**

**Supplemental material 3.** Comparison of overall substantial and complete recanalization rates across complete and partial stent retriever retraction and direct aspiration techniques.
